# Supplementary material for: A simple and sensitive spectrofluorimetric method for the determination of sodium hexametaphosphate based on the Tb(iii)–TATAB complex
Source: Royal Society of Chemistry journal article supplement (doi:10.1039/c7nj02155k), 2017-01-01
Supplement: c7nj02155k1.pdf [file c7nj02155k1.pdf]

## Supporting Information

*for*

### A simple and sensitive spectrofluorimetric method for the determination of sodium hexametaphosphate based on Tb(III)- TATAB complex

Wei Li, Guihua Ran, Xijuan Zhao\*<sup>b</sup> and Yuanfang Li\*<sup>a</sup>

<sup>a</sup>*Education Ministry Key Laboratory on Luminescence and Real-Time Analysis, School of Chemistry and Chemical Engineering, Southwest University, Chongqing 400715, China. E-mail: liyf@swu.edu.cn; Tel: (+86) 23 68254659; Fax: (+86) 23 68367257*

<sup>b</sup>*Key Laboratory of Horticulture Science for Southern Mountainous Regions, Ministry of Education, College of Horticulture and Landscape Architecture, Southwest University, Chongqing 400715, P. R. China. E-mail: xijuanzh@swu.edu.cn*

#### Materials

The ligand 4, 4', 4'' - (1, 3, 5-triazine-2, 4, 6-triyl)-tris (azanediyl))-tribenzoic acid (H<sub>3</sub>TATAB) (97%) was purchased from Shanghai naqian. Terbium(III) nitrate pentahydrate was commercially obtained from Aladdin. (NaPO<sub>3</sub>)<sub>6</sub>, CuSO<sub>4</sub>·5H<sub>2</sub>O, Na<sub>2</sub>HPO<sub>4</sub>, NaH<sub>2</sub>PO<sub>4</sub>, Na<sub>3</sub>PO<sub>4</sub>, NaHCO<sub>3</sub>, CH<sub>3</sub>COONa, NaBr and NaI were of analytical grade and were used without further purification, and all their solutions were prepared by dissolving these commercial products into doubly distilled water. Tris-HCl buffer solution was used to control the acidity of the solutions. Millipore purified water (18.2 MΩ. cm) was used throughout.

#### Apparatus

A U-3010 spectrophotometer (Hitachi, Tokyo, Japan) was used to record absorption spectra and measure absorbance. All fluorescence measurements performed with a pH-510 digital pH-meter with a combined glass electrode (California, USA). A QL-901 vortex mixer (Haimen, China) was employed to blend the solutions in 1.5 mL tubes.

#### Pretreatment of the tea drinks samples

The three kinds of tea drink samples obtained from the local supermarket. They were centrifuged for 30 min at 12,000 r/min about three times and the supernatant solutions were filtered with 0.22 μm membranes, respectively. The obtained filtrates were transferred for further detection.

#### Experimental procedures

50 μL Tris-HCl buffer solution and 200 μL 4, 4', 4'' - (1, 3, 5 -triazine-2, 4, 6-triyl)-tris (azanediyl))-tribenzoic acid working solution were mixed together at first in a 2.0 mL EP vial. Afterwards, an appropriate volume of Tb<sup>3+</sup> solution was added and mixed. The mixture was then diluted to a certain volume with doubly distilled water and mixed thoroughly again. At last, a certain volume of the anion solution was added into the mixture and the final total volume was 500 μL. After mixing thoroughly, a series of solutions were retained for 30 min and then was

transferred for fluorescence measurements. All fluorescence spectra were measured upon excitation at 337.0 nm by keeping both the excitation and emission slit widths at 5.0 nm, the PMT voltage at 400 V and the scan speed at 3000 nm min<sup>-1</sup>.

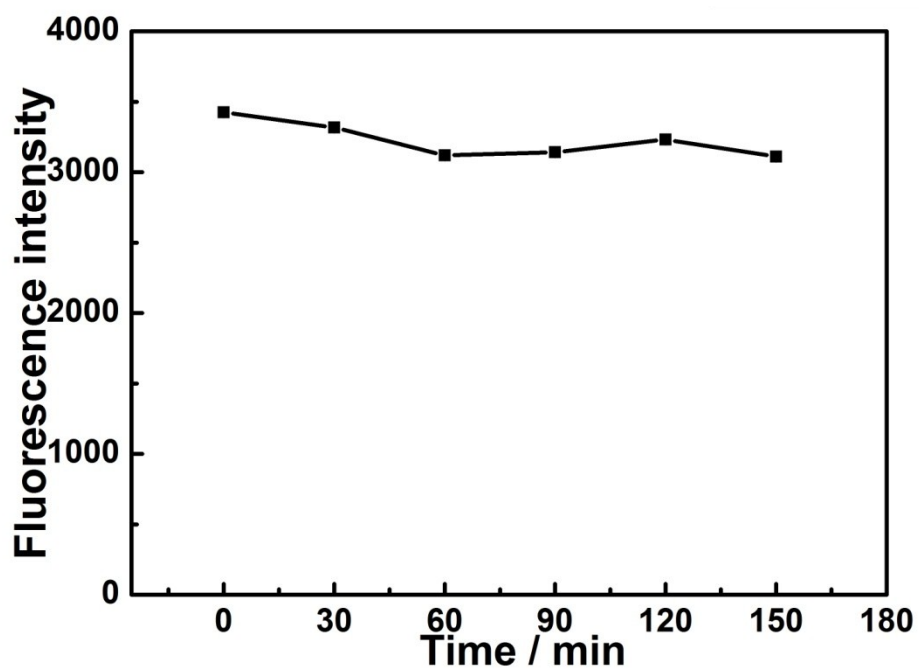

**Fig S1.** Effect of continuous excitations on the FL Intensities of Tb(III)-TATAB.  $c_{\text{H3TATAB}}$ ,  $5.0 \times 10^{-4}$  mol/L;  $c_{\text{Tb}^{3+}}$ ,  $2.5 \times 10^{-4}$  mol/L; pH, 7.4 (Tris-HCl buffer).

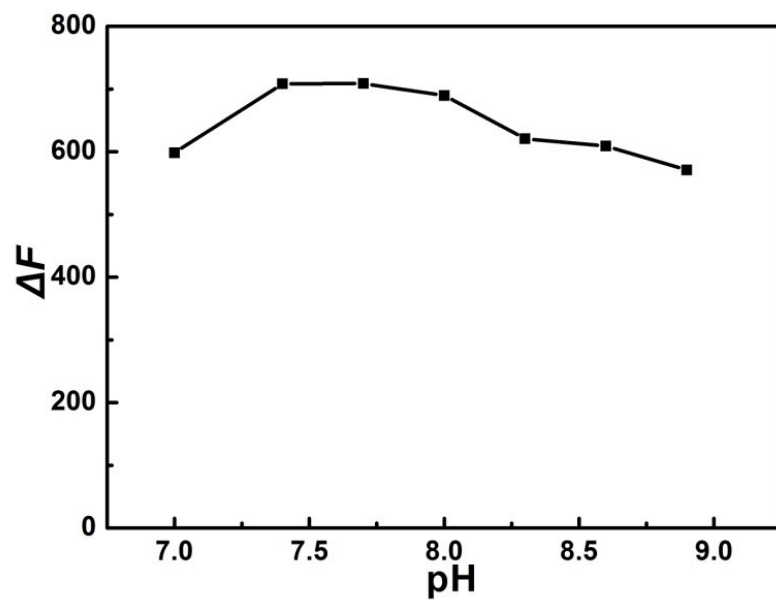

**Fig S2.** The effect of the pH on the binding processes between Tb(III)-TATAB and SHMP.  $c_{\text{H3TATAB}}$ ,  $5.0 \times 10^{-4}$  mol/L;  $c_{\text{Tb}^{3+}}$ ,  $2.5 \times 10^{-4}$  mol/L;  $c_{\text{SHMP}}$ ,  $2.5 \times 10^{-4}$  mol/L; pH, 7.4 (Tris-HCl buffer); Time, 30 min.

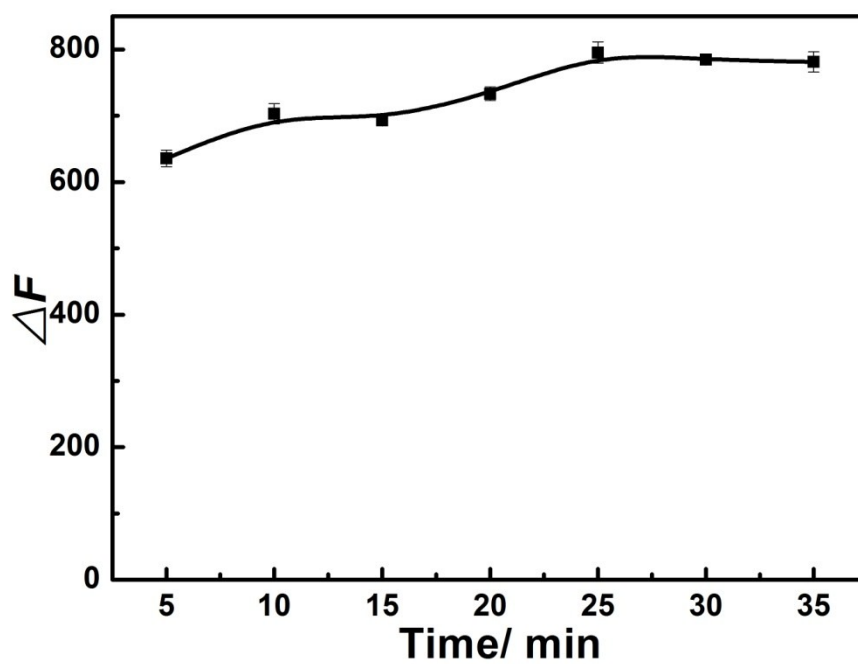

**Fig S3.** The effect of reaction time on the binding processes between Tb(III)-TATAB and SHMP.  $c_{\text{H3TATAB}}$ ,  $5.0 \times 10^{-4}$  mol/L;  $c_{\text{Tb}^{3+}}$ ,  $2.5 \times 10^{-4}$  mol/L;  $c_{\text{SHMP}}$ ,  $2.5 \times 10^{-4}$  mol/L; pH, 7.4 (Tris-HCl buffer); Time, 30 min.

Table S1. A comparison of different analytical techniques for determination of SHMP.

| Method                    | linear range       | Detection limit | Matrix         | Reference |
|---------------------------|--------------------|-----------------|----------------|-----------|
| ion chromatography        | 1-100 mg/Kg        | 5 mg/Kg         | cod or scallop | [5]       |
| spectrophotometry         | 3-10 $\mu$ M       | 1.6 $\mu$ M     | tea drink      | [2]       |
|                           | 0.8-11 $\mu$ M     | 0.53 $\mu$ M    | beverages      | [8]       |
|                           | 0.6-10 $\mu$ M     | 0.53 $\mu$ M    | beverages      | [10]      |
| SERS                      | 0.0125–0.3 $\mu$ M | 0.006 $\mu$ M   | tea water      | [9]       |
| fluorescence spectrometry | 0.5-100 $\mu$ M    | 0.38 $\mu$ M    | tea drink      | This work |
